# Supplementary material for: Selectivity of solid phase extraction of freshwater dissolved organic matter and its effect on ultrahigh resolution mass spectra
Source: Royal Society of Chemistry journal article supplement (doi:10.1039/c6em00200e), 2016-01-01
Supplement: c6em00200e1.pdf [file c6em00200e1.pdf]

## Supplementary material

### Selectivity of solid phase extraction of freshwater dissolved organic matter and its effect on ultrahigh resolution mass spectra

Julia Raeke <sup>a</sup>, Oliver J. Lechtenfeld <sup>a, b</sup>, Martin Wagner <sup>c</sup>, Peter Herzsprung <sup>d</sup>, Thorsten Reemtsma <sup>a</sup>

<sup>a</sup> Helmholtz Centre for Environmental Research - UFZ, Department of Analytical Chemistry, Permoserstrasse 15, 04318 Leipzig, Germany

<sup>b</sup> Helmholtz Centre for Environmental Research - UFZ, ProVIS – Centre for Chemical Microscopy, Permoserstrasse 15, 04318 Leipzig, Germany

<sup>c</sup> TZW: DVGW Water Technology Center, Wasserwerkstrasse 2, 01326 Dresden, Germany

<sup>d</sup> Helmholtz Centre for Environmental Research – UFZ, Department of Lake Research, Brueckstrasse 3a, 39114 Magdeburg, Germany

Corresponding author:

Thorsten Reemtsma

Helmholtz Centre for Environmental Research – UFZ, Department of Analytical Chemistry  
Permoserstrasse 15, 04318 Leipzig, Germany

Phone: +49 0341 235 1261

E-Mail: [thorsten.reemtsma@ufz.de](mailto:thorsten.reemtsma@ufz.de)

## Table of Contents

|          |                                                                                                                                                                             | Page |
|----------|-----------------------------------------------------------------------------------------------------------------------------------------------------------------------------|------|
| Table S1 | Properties of SPE cartridges used for extraction                                                                                                                            | 3    |
| Table S2 | SPE extraction method                                                                                                                                                       | 3    |
| Table S3 | Additional properties of the model compounds                                                                                                                                | 3    |
| Table S4 | Gradient used for UPLC-QTOF-MS of the model compounds                                                                                                                       | 4    |
| Table S5 | Extraction efficiencies of model compounds for the PPL and the HLB cartridge and the response factors (peak area/concentration)                                             | 4    |
| Table S6 | DOC concentrations of SEC fractions B – D of the DOM of the freshwater sample I and the extracts and permeates of the three SPE cartridges                                  | 5    |
| Table S7 | DOC concentrations of SEC fractions A – D of the DOM of the freshwater sample II and the extracts and permeates of the three SPE cartridges from sample II                  | 6    |
| Table S8 | DOC concentrations of SEC-OCD fractions A –D of the extracts for freshwater sample II using additional 4 ml of methanol (MeOH 2) and 4 ml of acetonitrile (ACN) for elution | 7    |
| Table S9 | Nitrogen containing compounds in the original samples I and III and in the extracts                                                                                         | 7    |
| Fig. S1  | SEC-OCD chromatograms of the original freshwater sample I and the extracts and permeates of PPL, HLB and C18                                                                | 8    |
| Fig. S2  | SEC-OCD chromatograms of the original freshwater sample II and the extracts and permeates of PPL, HLB and C18                                                               | 8    |
| Fig. S3  | SEC-OCD chromatogram of the original sample II and of the extracts of the HLB, the PPL and the C18 cartridge containing the methanol peak                                   | 9    |
| Fig. S4  | FT-ICR mass spectra of the original sample III and the extracts of the different SPE cartridges                                                                             | 9    |
| Fig. S5  | Van Krevelen diagrams of molecular formulae (only $C_xH_yO_z$ ) in the original sample III, the PPL extract, the HLB extract and the C18 extract                            | 10   |
| Fig. S6  | Frequency distribution of the O/C ratios and the DBE value of sample I and III, based on the original samples                                                               | 10   |

**Table S1.** Properties of SPE cartridges used for extraction.

| Cartridge               | Manufacturer | Material                                  | Average particle size ( $\mu\text{m}$ ) | Average pore size ( $\text{\AA}$ ) | Bed mass (mg) | Volume (mL) |
|-------------------------|--------------|-------------------------------------------|-----------------------------------------|------------------------------------|---------------|-------------|
| Bond Elut PPL           | Agilent      | modified styrene-divinylbenzene copolymer | 125                                     | 150                                | 500           | 6           |
| Oasis HLB               | Waters       | poly(N-vinylpyrrolidone-divinylbenzene)   | 30                                      | 80                                 | 500           | 6           |
| Bakerbond Octadecyl C18 | J. T. Baker  | C18                                       | 47 – 60                                 | 60                                 | 500           | 6           |

**Table S2.** SPE extraction method.

| Step                               | Solvent                                 | Delivery rate           | Soak time |
|------------------------------------|-----------------------------------------|-------------------------|-----------|
| Wash cartridge                     | 4 mL methanol                           | 10 mL min <sup>-1</sup> | 15 s      |
| Wash cartridge                     | 3 mL methanol                           | 10 mL min <sup>-1</sup> | 20 s      |
| Wash cartridge                     | 4 mL ultrapure water                    | 10 mL min <sup>-1</sup> | 10 s      |
| Wash cartridge                     | 3 mL 0.01 M HCl                         | 10 mL min <sup>-1</sup> | 10 s      |
| Wash cartridge                     | 4 mL 0.01 M HCl                         | 10 mL min <sup>-1</sup> | 10 s      |
| Load                               | 50 mL sample at 10 mL min <sup>-1</sup> | 5 mL min <sup>-1</sup>  |           |
| Wash cartridge                     | 3 mL 0.01 M HCl                         | 10 mL min <sup>-1</sup> | 10 s      |
| Wash cartridge                     | 3 mL 0.01 M HCl                         | 10 mL min <sup>-1</sup> | 10 s      |
| Dry for 10 min with N <sub>2</sub> |                                         |                         |           |
| Elute cartridge                    | 2 mL methanol                           | 5 mL min <sup>-1</sup>  | 120 s     |
| Elute cartridge                    | 2 mL methanol                           | 5 mL min <sup>-1</sup>  | 120 s     |
| Dry cartridge                      | 6 mL air                                | 5 mL min <sup>-1</sup>  |           |

**Table S3.** Additional properties of the model compounds.

| Index | Name                            | Supplier      | Purity (%) |
|-------|---------------------------------|---------------|------------|
| 1     | D-Sorbitol                      | Sigma-Aldrich | 98         |
| 2     | D-Glucuronic acid               | Alfa Aesar    | 98         |
| 3     | Cellobiose                      | Merck         | -          |
| 4     | Naphthalene-1,5-disulfonic acid | Sigma-Aldrich | 97         |
| 5     | Gallic acid                     | Merck         | -          |
| 6     | Glutaric acid                   | Sigma-Aldrich | 99         |
| 7     | 1,2-Dihydroxybenzene            | Sigma-Aldrich | ≥ 99       |
| 8     | 4-Hydroxybenzoic acid           | Merck         | 98         |
| 9     | Phthalic acid                   | Merck         | 99.5       |
| 10    | Chlorogenic acid                | Sigma-Aldrich | ≥ 95       |
| 11    | Vanillic acid                   | Sigma-Aldrich | ≥ 97       |
| 12    | (-)-Epicatechin                 | Fluka         | > 90       |
| 13    | 2-Hydroxy-2-phenylacetic acid   | Sigma-Aldrich | 99         |
| 14    | Syringic acid                   | Fluka         | ≥ 97       |
| 15    | Naphthalene-2-sulfonic acid     | Sigma-Aldrich | ≥ 98       |
| 16    | Ferulic acid                    | Fluka         | ≥ 98       |
| 17    | 12-Hydroxydodecanoic acid       | Sigma-Aldrich | 97         |
| 18    | Sodium dodecyl sulfate          | Merck         | ≥ 99       |

**Table S4.** Gradient used for UPLC-QTOF-MS of the model compounds.

| Time (min) | Eluent A (%) | Eluent B (%) |
|------------|--------------|--------------|
| 0          | 99.5         | 0.5          |
| 2          | 99.5         | 0.5          |
| 7.21       | 0.1          | 99.9         |
| 10.21      | 0.1          | 99.9         |
| 10.31      | 99.5         | 0.5          |
| 10.5       | 99.5         | 0.5          |

**Table S5.** Extraction efficiencies of model compounds for the PPL and the HLB cartridge and the response factor (peak area/concentration) in negative ESI, \* determined in positive ESI.

| Index | Substance                          | Extraction efficiency (%) |       |      |       |       |      | Response<br>(L $\mu\text{mol}^{-1}$ ) |
|-------|------------------------------------|---------------------------|-------|------|-------|-------|------|---------------------------------------|
|       |                                    | PPL 1                     | PPL 2 | Mean | HLB 1 | HLB 2 | Mean |                                       |
| 1     | D-Sorbitol                         | 0.0*                      | 0.0*  | 0.0  | 0.2*  | 1.3*  | 0.8  | 1252 (7855)*                          |
| 2     | D-Glucuronic acid                  | 0.0*                      | 0.0*  | 0.0  | 0.0*  | 0.0*  | 0.0  | 7424 (538)*                           |
| 3     | Cellobiose                         | 0.0*                      | 0.0*  | 0.0  | 0.0*  | 3.1*  | 1.5  | 417 (47523)*                          |
| 4     | Napthalene-1,5-<br>disulfonic acid | 1.6                       | 2.1   | 1.9  | 3.3   | 2.8   | 3.1  | 36269                                 |
| 5     | Gallic acid                        | 2.3                       | 2.4   | 2.3  | 83.6  | 88.5  | 86.0 | 38546                                 |
| 6     | Glutaric acid                      | 46.6                      | 44.9  | 45.8 | 76.8  | 75.5  | 76.2 | 7310                                  |
| 7     | 1,2-Dihydroxy-<br>benzene          | 64.2                      | 64.2  | 64.2 | 77.4  | 79.8  | 78.6 | 5006                                  |
| 8     | 4-Hydroxy-<br>benzoic acid         | 93.0                      | 92.7  | 92.8 | 76.2  | 76.0  | 76.1 | 20896                                 |
| 9     | Phthalic acid                      | 95.2                      | 90.2  | 92.7 | 86.5  | 75.8  | 81.2 | 59725                                 |
| 10    | Chlorogenic acid                   | 91.5                      | 94.4  | 93.0 | 82.2  | 83.3  | 82.7 | 154810                                |
| 11    | Vanillic acid                      | 97.6                      | 86.7  | 92.2 | 68.3  | 74.4  | 71.3 | 3572                                  |
| 12    | (-)-Epicatechin                    | 71.3                      | 71.9  | 71.6 | 32.8  | 34.7  | 33.8 | 58996                                 |
| 13    | 2-Hydroxy-2-<br>phenylacetic acid  | 93.6                      | 93.3  | 93.5 | 77.2  | 77.4  | 77.3 | 26152                                 |
| 14    | Syringic acid                      | 98.3                      | 92.5  | 95.4 | 74.1  | 68.5  | 71.3 | 8471                                  |
| 15    | Napthalene-2-<br>sulfonic acid     | 78.9                      | 81.6  | 80.3 | 0.0   | 0.0   | 0.0  | 271306                                |
| 16    | Ferulic acid                       | 95.3                      | 95.4  | 95.4 | 73.4  | 77.3  | 75.4 | 41299                                 |
| 17    | 12-Hydroxy<br>dodecanoic acid      | 72.3                      | 66.7  | 69.5 | 63.8  | 65.2  | 64.5 | 331970                                |
| 18    | Sodium dodecyl<br>sulfate          | 59.0                      | 66.7  | 62.9 | 0.0   | 1.1   | 0.5  | 1674462                               |

**Table S6.** DOC concentrations of SEC fractions B – D of the DOM of the freshwater sample I and the extracts and permeates of the three SPE cartridges, \* % of original sample, LOD = 10  $\mu\text{g L}^{-1}$ , LOQ = 40  $\mu\text{g L}^{-1}$ , n.d. = not determined,  $\bar{x}$  = arithmetical mean, the mean molecular weight  $M_n$  was only determined for fraction B ('humic substances') and no fraction A was determined in these samples.

| Sample I                      | Sum of B to D          |    | Fraction B             |    |                        | Fraction C             |     | Fraction D             |      |
|-------------------------------|------------------------|----|------------------------|----|------------------------|------------------------|-----|------------------------|------|
|                               | $\mu\text{g L}^{-1}$ C | %* | $\mu\text{g L}^{-1}$ C | %* | $M_n$ (g mol $^{-1}$ ) | $\mu\text{g L}^{-1}$ C | %*  | $\mu\text{g L}^{-1}$ C | %*   |
| original I                    | 9424                   |    | 8626                   |    | 1012                   | 572                    |     | 226                    |      |
| original II                   | 9506                   |    | 8676                   |    | 1032                   | 606                    |     | 224                    |      |
| $\bar{x}$ original            | 9465                   |    | 8651                   |    |                        | 589                    |     | 225                    |      |
| PPL extract I                 | 6672                   | 70 | 5858                   | 68 | 1000                   | 588                    | 100 | 226                    | 100  |
| PPL extract II                | 5774                   | 61 | 5004                   | 58 | 1026                   | 578                    | 98  | 192                    | 85   |
| $\bar{x}$ extracts            | 6223                   | 66 | 5431                   | 63 |                        | 583                    | 99  | 209                    | 93   |
| PPL permeate I                | 612                    | 6  | 500                    | 6  | 837                    | 78                     | 13  | < 40                   | n.d. |
| PPL permeate II               | 484                    | 5  | 366                    | 4  | 744                    | 80                     | 14  | < 40                   | n.d. |
| $\bar{x}$ permeate            | 548                    | 6  | 433                    | 5  |                        | 79                     | 13  | < 40                   | n.d. |
| $\Sigma$ extracts + permeates | 6771                   | 72 | 5864                   | 68 |                        | 662                    | 112 | > 209                  | > 93 |
| HLB extract I                 | 2200                   | 23 | 1356                   | 16 | 755                    | 420                    | 71  | 150                    | 67   |
| HLB extract II                | 1846                   | 20 | 1064                   | 12 | 742                    | 344                    | 58  | 134                    | 60   |
| $\bar{x}$ extracts            | 2023                   | 21 | 1210                   | 14 |                        | 382                    | 65  | 142                    | 63   |
| HLB permeate I                | 292                    | 3  | 214                    | 2  | 745                    | 78                     | 13  | < 10                   | n.d. |
| HLB permeate II               | 290                    | 3  | 230                    | 3  | 695                    | 60                     | 10  | < 10                   | n.d. |
| $\bar{x}$ permeates           | 291                    | 3  | 222                    | 3  |                        | 69                     | 12  | < 10                   | n.d. |
| $\Sigma$ extracts + permeates | 2314                   | 24 | 1432                   | 17 |                        | 451                    | 77  | 142                    | 63   |
| C18 extract I                 | 6748                   | 71 | 5716                   | 66 | 1106                   | 834                    | 142 | 198                    | 88   |
| C18 extract II                | 5394                   | 54 | 4584                   | 53 | 1092                   | 644                    | 109 | 166                    | 74   |
| $\bar{x}$ extracts            | 6071                   | 67 | 5150                   | 60 |                        | 739                    | 125 | 182                    | 81   |
| C18 permeate I                | 1294                   | 14 | 1122                   | 13 | 781                    | 114                    | 19  | 58                     | 26   |
| C18 permeate II               | 1264                   | 13 | 1066                   | 12 | 789                    | 150                    | 25  | 48                     | 21   |
| $\bar{x}$ permeates           | 1279                   | 14 | 1094                   | 13 |                        | 132                    | 22  | 53                     | 24   |
| $\Sigma$ extracts +permeates  | 7350                   | 78 | 6244                   | 72 |                        | 871                    | 148 | 235                    | 104  |

**Table S7.** DOC concentrations of SEC fractions A – D of the DOM of the freshwater sample II and the extracts and permeates of the three SPE cartridges from sample II, \* % of original sample, LOD = 10  $\mu\text{g L}^{-1}$ , LOQ = 40  $\mu\text{g L}^{-1}$ , n.d. = not determined, the mean molecular weight  $M_n$  was only determined for fraction B ('humic substances').

| Sample II    | Sum of A to D          |    | Fraction A             |      | Fraction B             |    |                              | Fraction C             |      | Fraction D             |     |
|--------------|------------------------|----|------------------------|------|------------------------|----|------------------------------|------------------------|------|------------------------|-----|
|              | $\mu\text{g L}^{-1}$ C | %* | $\mu\text{g L}^{-1}$ C | %*   | $\mu\text{g L}^{-1}$ C | %* | $M_n$ (g mol <sup>-1</sup> ) | $\mu\text{g L}^{-1}$ C | %*   | $\mu\text{g L}^{-1}$ C | %*  |
| original     | 4371                   |    | 324                    |      | 3150                   |    | 783                          | 571                    |      | 326                    |     |
| PPL extract  | 2678                   | 61 | 55                     | 17   | 1763                   | 56 | 777                          | 548                    | 96   | 312                    | 96  |
| PPL permeate | 383                    | 9  | < 10                   | n.d. | 304                    | 10 | n.d.                         | < 40                   | n.d. | 64                     | 20  |
| $\Sigma$     | 3061                   | 70 | > 55                   | > 17 | 2067                   | 66 |                              | > 548                  | > 96 | 376                    | 116 |
| HLB extract  | 1661                   | 38 | 68                     | 21   | 921                    | 29 | 657                          | 419                    | 73   | 253                    | 78  |
| HLB permeate | 366                    | 8  | < 40                   | n.d. | 217                    | 7  | 686                          | 76                     | 13   | 44                     | 13  |
| $\Sigma$     | 2027                   | 46 | > 68                   | > 21 | 1138                   | 36 |                              | 495                    | 86   | 297                    | 91  |
| C18 extract  | 2160                   | 49 | 58                     | 18   | 1516                   | 48 | 734                          | 313                    | 55   | 273                    | 84  |
| C18 permeate | 1711                   | 39 | 70                     | 22   | 846                    | 27 | 776                          | 574                    | 101  | 221                    | 68  |
| $\Sigma$     | 3871                   | 88 | 128                    | 40   | 2362                   | 75 |                              | 887                    | 156  | 494                    | 152 |

**Table S8.** DOC concentrations of SEC-OCD fractions A –D of the extracts for freshwater sample II using additional 4 ml of methanol (MeOH 2) and 4 ml of acetonitrile (ACN) for elution. LOD = 10  $\mu\text{g L}^{-1}$ , LOQ = 40  $\mu\text{g L}^{-1}$ .

| Sample     | Sum of A to D          |               | Fraction A             | Fraction B             | Fraction C             | Fraction D             |
|------------|------------------------|---------------|------------------------|------------------------|------------------------|------------------------|
|            | $\mu\text{g L}^{-1}$ C | % of original | $\mu\text{g L}^{-1}$ C | $\mu\text{g L}^{-1}$ C | $\mu\text{g L}^{-1}$ C | $\mu\text{g L}^{-1}$ C |
| original   | 4371                   |               | 324                    | 3150                   | 571                    | 326                    |
| PPL MeOH 2 | 90                     | 2             | < 10                   | 59                     | < 40                   | < 40                   |
| PPL ACN    | 76                     | 2             | < 40                   | < 40                   | < 40                   | < 40                   |
| HLB MeOH 2 | 325                    | 7             | < 10                   | 197                    | 95                     | < 40                   |
| HLB ACN    | 116                    | 3             | < 10                   | < 40                   | < 40                   | < 10                   |
| C18 MeOH 2 | 52                     | 1             | < 10                   | < 40                   | < 10                   | < 40                   |
| C18 ACN    | 42                     | 1             | < 10                   | < 10                   | < 40                   | < 10                   |

**Table S9.** Nitrogen containing compounds in the original samples I and III and in the extracts.

|                                 | Sample I |     |     |     | Sample III |     |     |     |
|---------------------------------|----------|-----|-----|-----|------------|-----|-----|-----|
|                                 | Original | PPL | HLB | C18 | Original   | PPL | HLB | C18 |
| Sum of relative intensities (%) | 4.7      | 2.9 | 3.7 | 1.4 | 4.2        | 3.9 | 4.1 | 3.0 |
| Proportion of the original (%)  |          | 61  | 79  | 30  |            | 93  | 98  | 71  |
| Number of sum formulae          | 405      | 247 | 301 | 96  | 216        | 182 | 176 | 148 |
| Proportion of the original (%)  |          | 61  | 74  | 24  |            | 84  | 81  | 69  |

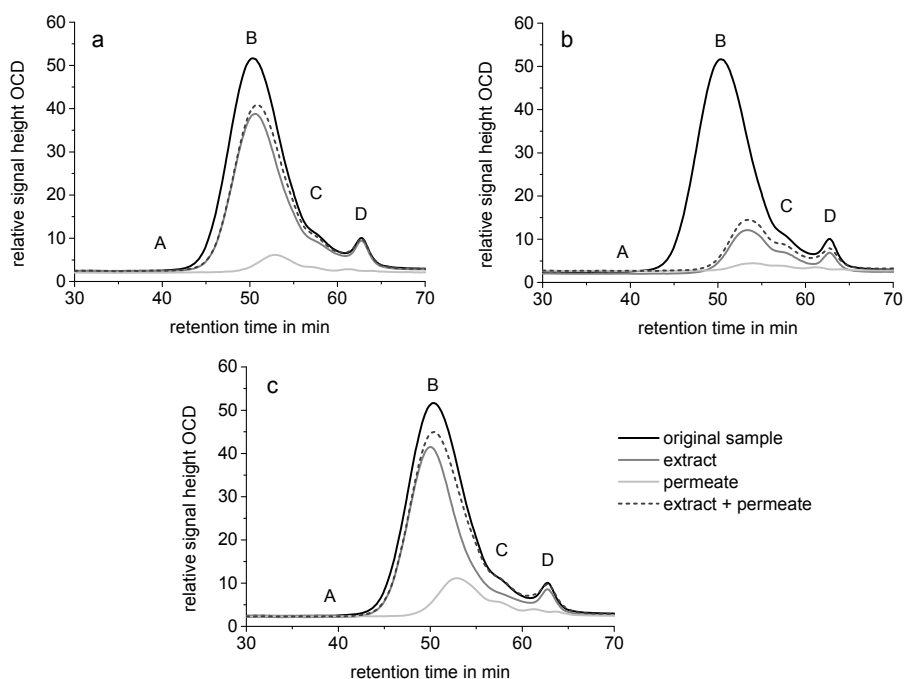

**Fig. S1.** SEC-OCD chromatograms of the original freshwater sample I and the extracts and permeates of a: PPL, b: HLB and c: C18, A: biopolymers, B: humic substances, C: building blocks, D: low molecular weight acids.

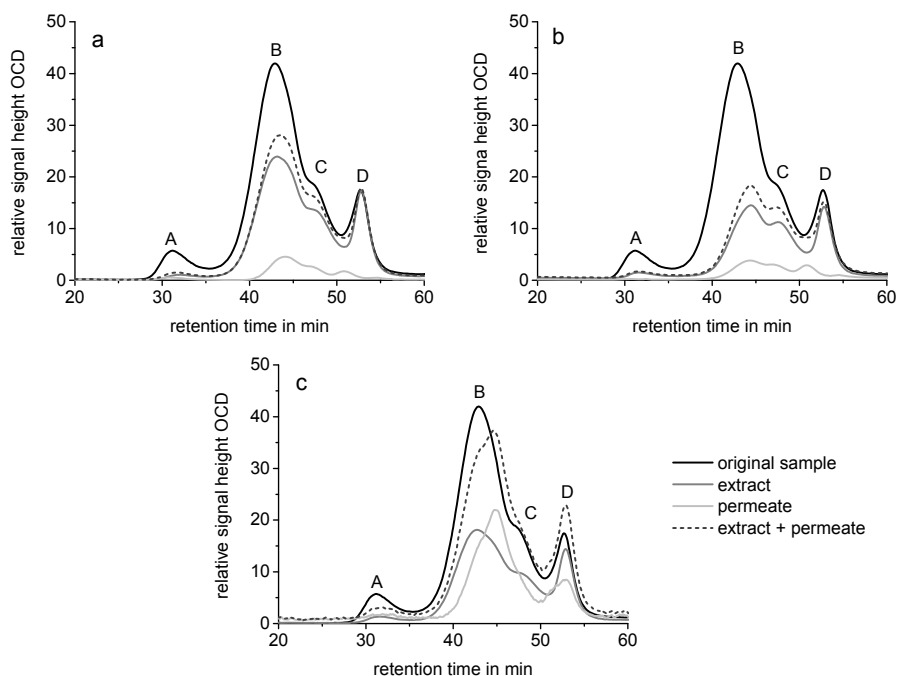

**Fig. S2.** SEC-OCD chromatograms of the original freshwater sample II and the extracts and permeates of a: PPL, b: HLB and c: C18, A: biopolymers, B: humic substances, C: building blocks, D: low molecular weight acids.



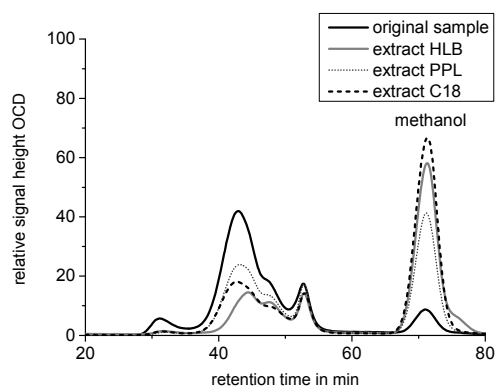

**Fig. S3.** SEC-OCD chromatogram of the original sample II and of the extracts of the HLB, the PPL and the C18 cartridge containing the methanol peak ( $t_R \approx 70$  min).

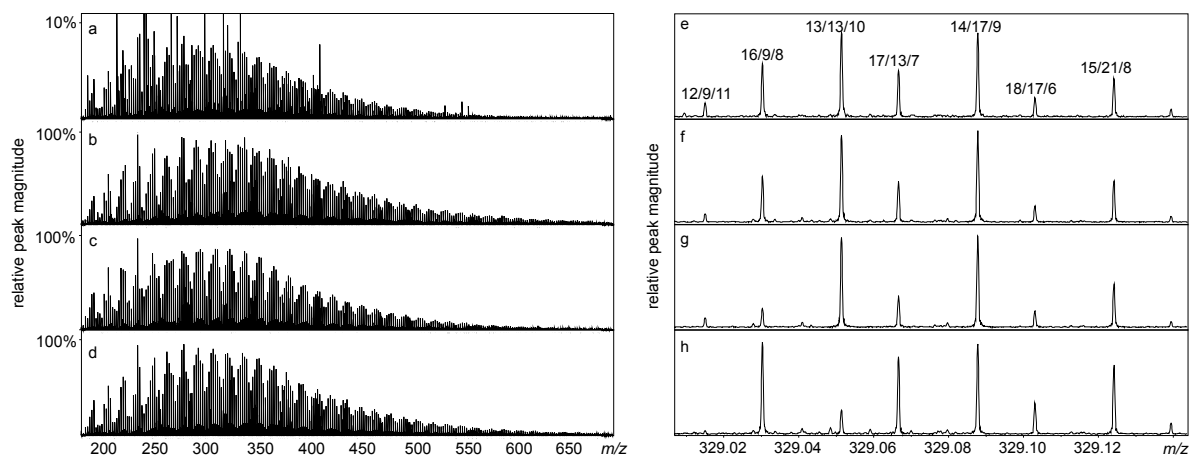

**Fig. S4.** FT-ICR mass spectra of the original sample III and the extracts of the different SPE cartridges, full spectrum (left) and nominal mass 329 (right), a, e: original sample, b, f: PPL extract, c, g: HLB extract, d, h: C18 extract. Numbers at peak tops denote the numbers of C/H/O in the respective molecular anions.

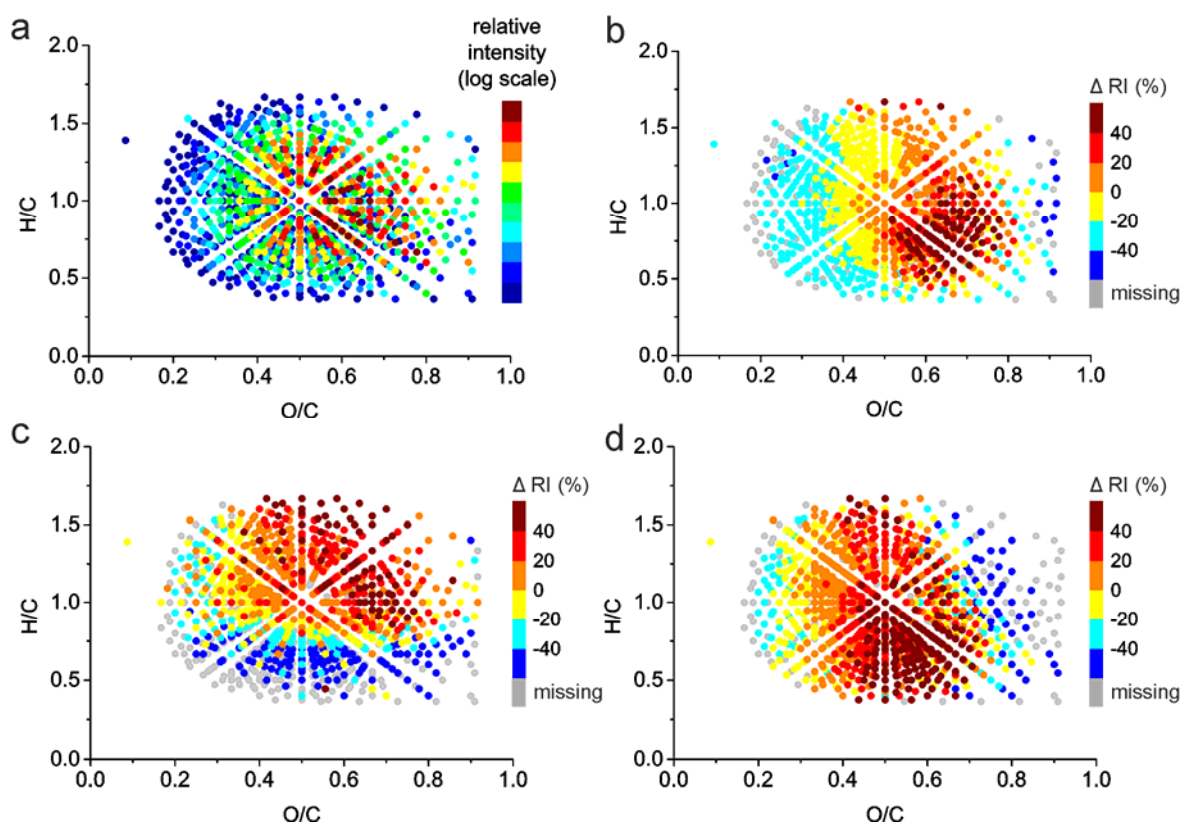

**Fig. S5.** Van Krevelen diagrams of molecular formulae (only  $C_xH_yO_z$ ) in a: the original sample III, b: the PPL extract, c: the HLB extract, d: the C18 extract. The  $\Delta RI$  was calculated relative to the original sample III (see eqn (2) in the main text).

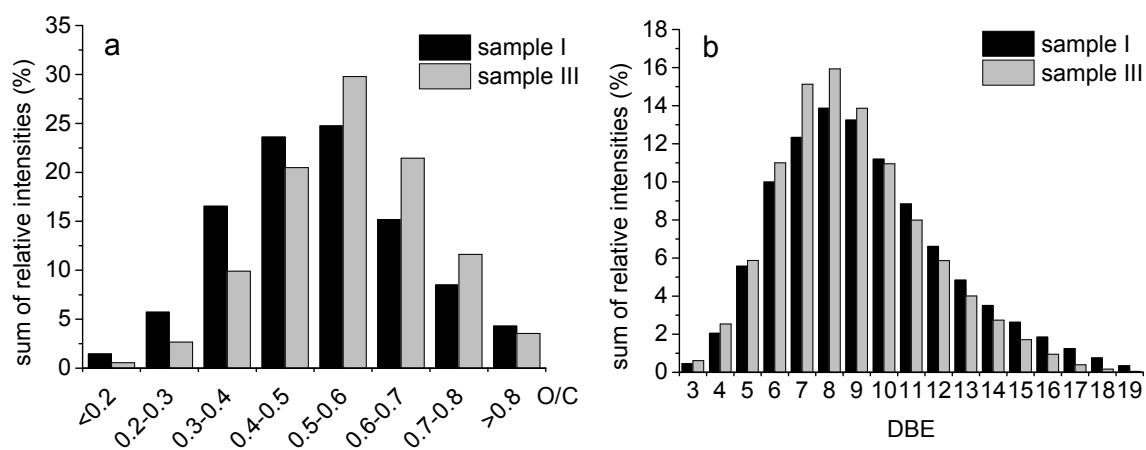

**Fig. S6.** Frequency distribution of the O/C ratios (a) and the DBE values (b) of sample I and III, based on the original samples.
